# Supplementary material for: Zebrafish Microenvironment Elevates EMT and CSC-Like Phenotype of Engrafted Prostate Cancer Cells
Source: PubMed Central journal article supplement (PMC7226630; doi:10.3390/cells9040797), 2020-03-26
Supplement: cells-09-00797-s001.pdf [file cells-09-00797-s001.pdf]

**Table 1. Real time-qPCR primers**

| <b>Gene</b> | <b>Forwards primers</b> | <b>Reverse Primers</b>   |
|-------------|-------------------------|--------------------------|
| CDH1        | TTGACGCCGAGAGCTACAC     | GACCGGTGCAATCTTCAA       |
| Vimentin    | CCAAACTTTTCCTCCCTGAACC  | CTGATGCTGAGAAGTTTCGTTGA  |
| Zeb1        | CCATATTGAGCTGTTGCCGC    | GCCCTTCCTTCCTGTGTCA      |
| Zeb2        | GACCTGGCAGTGAAGGAAAA    | GCACTTGCAGAAACACAGA      |
| Snail1      | CCAGTGCCTCGACCACTATG    | CTGCTGGAAGGTAACCTTGGA    |
| Twist       | GCCGAGACCTAGATGTCATT    | TTTTAAAAGTGCCECCACG      |
| CD44        | TGGCACCCGCTATGTCCAG     | GTAGCAGGGATTCTGTCTG      |
| Nanog       | AATACCTCAGCCTCCAGCAGATG | TGCGTCACACCATTGCTATTCTTC |
| OCT4        | GAGAACCGAGTGAGAGGCAACC  | CATAGTCGCTGCTTGATCGCTTG  |
| Sox2        | TACAGCATGTCCTACTCGCAG   | GAGGAAGAGGTAACCACAGGG    |
| Bmi1        | TGATGTGTGTGCTTTGTGGAG   | GGTCTGGTCTTGTGAACTTGG    |
| Klf4        | CCCAATTACCCATCCTTCCT    | ACGATCGTCTTCCCCTCTTT     |
| Cripto      | CACGATGTGCGCAAAGAGAA    | TGACCGTGCCAGCATTTACA     |
| ALDH7A1     | CAACGAGCCAATAGCAAGAG    | GCATCGCCAATCTGTCTTAC     |
| GAPDH       | CTCTGCTCCTCTGTTCGAC     | GACCAAATCCGTTGACTCCG     |
